# Supplementary material
Source: Research Square preprint supplement (doi:10.21203/rs.3.rs-10317525/v1)
Supplement: Supplementary file 1 [file e3d9ec7968b9c8622a490a1f.docx]

# Supplementary Information Outline

- Expanded trajectory instrumentation details and projection procedure.
- Full timestep metric definitions.
- Complete full-trajectory feature table.
- Repeated-CV fold score distributions.
- Prefix eligibility counts and class balance.
- Sensitivity analysis for clean-reference basin construction and rolling windows.
